# Supplementary material for: Facility and Regional Factors Associated With the New Adoption of Electronic Medical Records in Japan: Nationwide Longitudinal Observational Study
Source: PubMed Central journal article supplement (PMC6598416; doi:10.2196/14026), 2019-06-14
Supplement: medinform_v7i2e14026_app1.pdf [file medinform_v7i2e14026_app1.pdf]

Multimedia Appendix 1. Aggregated data regarding the electronic medical record adoption status in fiscal years 2011, 2014, and 2017.

|             | <b>Hospitals</b>  |                                    |                             | <b>Clinics</b>     |                                    |                             |
|-------------|-------------------|------------------------------------|-----------------------------|--------------------|------------------------------------|-----------------------------|
|             | <b>Adoption</b>   | <b>Specified adoption schedule</b> | <b>No adoption schedule</b> | <b>Adoption</b>    | <b>Specified adoption schedule</b> | <b>No adoption schedule</b> |
| <b>2011</b> | 1,729<br>(20.44%) | 1,230<br>(14.54%)                  | 5,501<br>(65.02%)           | 20,797<br>(21.22%) | 3,434<br>(3.50%)                   | 73,773<br>(75.28%)          |
| <b>2014</b> | 2,733<br>(32.18%) | 1,897<br>(22.34%)                  | 3,863<br>(45.48%)           | 35,178<br>(35.02%) | 4,244<br>(4.22%)                   | 61,039<br>(60.76%)          |
| <b>2017</b> | 3,693<br>(43.90%) | 1,592<br>(18.93%)                  | 3,127<br>(37.17%)           | 42,167<br>(41.56%) | 4,697<br>(4.63%)                   | 54,607<br>(53.82%)          |

Values are given as n (%).
